# Supplementary material for: Physician-patient communication about overactive bladder: Results of an observational sociolinguistic study
Source: PLoS One. 2017 Nov 15;12(11):e0186122. doi: 10.1371/journal.pone.0186122 (PMC5687746; doi:10.1371/journal.pone.0186122)
Supplement: S1 Data — (XLSX) [file pone.0186122.s006.xlsx]

## Sheet: Data by Patient
Patient Demographics																									Linguistic Data (Visit)													Patient Satisfaction (Patient Questionnaire)				Concerns about Tx (Visit)		QOL (Visit + post-visit interviews)				Adherence (Visit + post-visit interviews)
PT #	PT Initials	PT Gender	PT Ethnicity	PT Age	Insurance coverage	Prescription coverage	Length of MD-PT relationship: This is my first visit	Length of MD-PT relationship: Less than 1 year	Length of MD-PT relationship: Between 1 and 3 years	Length of MD-PT relationship: Between 3 and 5 years	Length of MD-PT relationship: More than 5 years	Visit frequency: This is my first visit	Visit frequency: More than once per month	Visit frequency: Once per month	Visit frequency: Every 2-3 months	Visit frequency: Every 4 months	Visit frequency: Every 6 months	Visit frequency: Other (please specify)	MD Initials	MD Specialty	MD Gender	State	Patient has urge incontinence or a mix of urge and stress incontinence	Patient is New OAB patient (Dx w/in 6 months) or Established (Dx 6 months or more ago)	% Ask	% Open-ended	% Closed-ended	# Successful Sequences	% Successful Sequences	% patient elaborated	Any Second Ask	#Ask-tell-ask	#Ask-tell	#Tell-ask	#ATA includes open-ended	#ATA includes successful sequence	Are changes made to treatment during visit?	Is patient currently using medication for OAB?	Extremely satisfied with current medication	Satisfied with current medication	Unsatisfied with current medication	Are side effects of OAB meds discussed in visit?	Does MD allay concerns about side effects of treatment?	Is quality of life discussed in visit?	Who brings up QoL?	Is QoL impact significant? (PT interview)	Are Patients and Physicians aligned on QOL impacts?	Is adherence discussed in visit?	MD-PT alignment on Adherence
1		F	Caucasian	79	Yes	Yes	0	0	0	0	More than 5 years	0	0	0	Every 2-3 months	0	0	0		PCP	M	CA	Mixed	New	0.0714286	0	1	0	0	0	0	0	0	0	0	0	No	No	n/a	n/a	n/a	No	n/a	Yes	Patient	No	n/a	No	No
2		F	Caucasian	77	Yes	Yes	0	0	0	0	More than 5 years	0	0	0	Every 2-3 months	0	0	0		PCP	M	CA	Mixed	Established	0.45	0	1	0	0	0.5	1	1	4	0	0	0	Yes	Yes	0	0	Unsatisfied	No	n/a	Yes	Patient	Yes	Partially	No	Yes
3		F	African-American	57	Yes	Yes	0	0	0	Between 3 and 5 years	0	0	More than once per month	0	0	0	0	0		PCP	M	CA	Mixed	Established	0.434783	0	1	0	0	0.6	0	0	3	0	0	0	No	Yes	0	Satisfied	0	No	n/a	Yes	Patient	Yes	No	No	Yes
4		F	Caucasian	80	Yes	Yes	0	0	0	0	More than 5 years	0	More than once per month	0	0	0	0	0		PCP	M	CA	Urge	Established	0.46875	0.133333	0.866667	1	0.0714286	0.214286	0	0	3	0	0	0	No	Yes	Extremely satisfied	0	0	Yes	No	No	n/a	Yes	No	No	No
5		F	Caucasian	47	Yes	Yes	0	0	Between 1 and 3 years	0	0	0	0	0	0	0	0	Only saw once, other		GYN	M	CA	Urge	Established	0.464286	0.0769231	0.923077	0	0	0.5	0	0	0	0	0	0	No	Yes	0	0	Unsatisfied	Yes	No	No	n/a	Yes	No	Yes	Yes
6		F	Asian	38	Yes	Yes	0	0	0	0	More than 5 years	0	0	0	0	0	0	once a year, other		GYN	M	CA	Urge	Established	0.611111	0.0909091	0.909091	0	0	0.8	0	0	2	0	0	0	No	Yes	Extremely satisfied	0	0	Yes	No	No	n/a	Yes	No	No	No
7		F	Caucasian	58	Yes	Yes	0	Less than 1 year	0	0	0	0	0	Once per month	0	0	0	0		GYN	M	CA	Mixed	New	0.388889	0.047619	0.952381	1	0.047619	0.571429	1	2	3	0	0	0	Yes	Yes	0	0	Unsatisfied	Yes	No	Yes	Patient	Yes	No	No	No
8		F	Caucasian	71	Yes	Yes	0	Less than 1 year	0	0	0	0	0	0	Every 2-3 months	0	0	0		GYN	M	TX	Mixed	Established	0.464286	0	1	0	0	0.538462	0	0	3	0	0	0	Yes	Yes	0	Satisfied	0	Yes	No	No	n/a	Yes	No	No	No
9		F	Caucasian	70	Yes	Yes	⁭This is my first visit	0	0	0	0	This is my first visit	0	0	0	0	0	0		GYN	M	TX	Mixed	New	0.672727	0	1	0	0	0.4375	0	0	3	0	0	0	Yes	No	n/a	n/a	n/a	No	n/a	No	n/a	Yes	n/a	No	Yes
10		F	Caucasian	39	Yes	Yes	0	0	Between 1 and 3 years	0	0	0	0	0	0	0	0	Last saw 4/2011, other		GYN	M	TX	Mixed	Established	0.586957	0	1	0	0	0.76	1	3	0	0	0	0	Yes	Yes	0	0	Unsatisfied	No	n/a	Yes	Patient	Yes	No	No	No
11		F	Hispanic	53	Yes	Yes	0	Less than 1 year	0	0	0	0	More than once per month	0	0	0	0	0		GYN	M	TX	Mixed	New	0.40625	0	1	0	0	0.307692	1	2	2	0	0	0	Yes	Yes	0	Satisfied	0	No	n/a	No	n/a	Yes	No	No	No
12		F	African-American	71	Yes	Yes	0	Less than 1 year	0	0	0	0	0	Once per month	0	0	0	0		GYN	M	IL	Urge	New	0.307692	0.25	0.75	1	0.25	0.5	1	1	1	0	0	0	No	No	n/a	n/a	n/a	No	n/a	No	n/a	Yes	No	No	No
13		F	African-American	63	Yes	Yes	0	0	Between 1 and 3 years	0	0	0	0	0	Every 2-3 months	0	0	0		GYN	M	IL	Urge	Established	0.636364	0	1	0	0	0.142857	0	0	4	0	0	0	No	Yes	0	Satisfied	0	Yes	No	No	n/a	Yes	No	No	No
14		F	Caucasian	78	Yes	Yes	0	0	0	0	More than 5 years	0	0	0	Every 2-3 months	0	0	0		URO	M	IL	Mixed	Established	0.2	0	1	0	0	0.333333	0	0	2	0	0	0	No	No	n/a	n/a	n/a	No	n/a	No	n/a	Yes	No	No	Yes
15		M	Caucasian	84	Yes	Yes	0	0	0	0	More than 5 years	0	0	0	0	0	Every 6 months	0		URO	M	IL	Urge	Established	0.4	0.25	0.75	1	0.25	0.75	0	0	2	0	0	0	No	Yes	Extremely satisfied	0	0	Yes	No	No	n/a	Yes	No	No	Yes
16		M	Caucasian	56	Yes	Yes	0	0	Between 1 and 3 years	0	0	0	0	0	0	0	Every 6 months	0		URO	M	IL	Urge	Established	0.315789	0.166667	0.833333	0	0	0.8	0	0	2	0	0	0	No	Yes	Extremely satisfied	0	0	No	n/a	No	n/a	Yes	No	No	Yes
17		F	African-American	28	Yes	Yes	0	Less than 1 year	0	0	0	0	0	0	0	0	0	2nd visit, other		URO	M	IL	Mixed	New	0.47619	0.3	0.7	3	0.3	0.3	1	1	2	1	1	1	No	No	n/a	n/a	n/a	No	No	No	n/a	Yes	No	No	No
18		F	Asian	66	Yes	Yes	0	Less than 1 year	0	0	0	0	0	0	Every 2-3 months	0	0	0		URO/GYN	F	NJ	Urge	New	0.16	0	1	0	0	0.5	1	1	2	0	0	0	No	Yes	0	Satisfied	0	Yes	Yes	Yes	Physician	Yes	Yes	No	Yes
19		F	Caucasian	48	Yes	Yes	0	Less than 1 year	0	0	0	0	0	Once per month	0	0	0	0		URO/GYN	F	NJ	Mixed	New	0.511628	0.0909091	0.909091	2	0.0909091	0.272727	0	0	4	0	0	0	Yes	Yes	0	0	Unsatisfied	Yes	Yes	Yes	Physician	Yes	No	No	Yes
20		F	Caucasian	64	Yes	Yes	0	0	Between 1 and 3 years	0	0	0	0	0	0	0	Every 6 months	0		URO/GYN	F	NJ	Urge	Established	0.368421	0.142857	0.857143	1	0.142857	0.285714	0	0	2	0	0	0	No	Yes	Extremely satisfied	0	0	Yes	Yes	No	n/a	Yes	Partially	No	No
21		F	Caucasian	70	Yes	Yes	0	Less than 1 year	0	0	0	0	0	0	0	Every 4 months	0	0		URO/GYN	F	NJ	Urge	Established	0.375	0.166667	0.833333	1	0.0909091	0.181818	1	1	1	1	0	0	Yes	No	n/a	n/a	n/a	Yes	No	No	n/a	Yes	Partially	Yes	No
22		F	Hispanic	35	Yes	Yes	0	Less than 1 year	0	0	0	0	0	0	0	0	0	When ever I can see him, other		URO	M	NY	Urge	New	0.85	0.352941	0.647059	3	0.214286	0.357143	0	0	3	0	0	0	No	Yes	0	Satisfied	0	Yes	Yes	Yes	Physician	Yes	No	No	Yes
23		F	Caucasian	26	Yes	Yes	0	Less than 1 year	0	0	0	0	More than once per month	0	0	0	0	0		URO	M	NY	Urge	New	0.684211	0.153846	0.846154	2	0.153846	0.153846	0	0	3	0	0	0	Yes	Yes	0	0	Unsatisfied	Yes	No	No	n/a	Yes	No	No	Yes
24		M	African-American	73	Yes	Yes	0	0	0	0	More than 5 years	0	0	0	0	Every 4 months	0	0		URO	M	NY	Urge	Established	0.869565	0.2	0.8	1	0.0588235	0.294118	0	0	1	0	0	0	No	Yes	0	Satisfied	0	Yes	No	No	n/a	No	No	Yes	Yes
25		F	Caucasian	85	Yes	Yes	0	0	0	0	More than 5 years	0	0	0	Every 2-3 months	0	0	0		PCP	M	NJ	Urge	Established	0.553191	0.0384615	0.961538	0	0	0.423077	0	0	6	0	0	0	Yes	No	n/a	n/a	n/a	Yes	No	No	n/a	Yes	Partially	Yes	Yes
26		F	Caucasian	69	Yes	Yes	0	0	0	0	More than 5 years	0	0	0	Every 2-3 months	0	0	0		PCP	M	NJ	Urge	Established	0.48	0.166667	0.833333	2	0.166667	0.416667	0	0	1	0	0	0	Yes	Yes	0	Satisfied	0	Yes	No	Yes	Physician	Yes	No	No	Yes
27		F	Caucasian	70	Yes	Yes	0	0	0	0	More than 5 years	0	0	0	0	0	0	About once a year, other		PCP	M	NJ	Urge	Established	0.655172	0.157895	0.842105	3	0.166667	0.277778	0	0	4	0	0	0	Yes	No	n/a	n/a	n/a	Yes	Yes	Yes	Physician	No	No	No	n/a
28		F	Caucasian	65	Yes	Yes	0	0	Between 1 and 3 years	0	0	0	0	0	0	0	Every 6 months	0		URO	M	FL	Mixed	New	0.545455	0.0833333	0.916667	0	0	0.454545	1	1	1	0	0	0	No	Yes	0	Satisfied	0	No	n/a	Yes	Patient	Yes	No	No	No
29		F	Caucasian	57	Yes	Yes	0	0	0	0	More than 5 years	0	0	0	Every 2-3 months	0	0	0		PCP	F/F	NJ	Urge	Established	0.473684	0.222222	0.777778	2	0.222222	0.333333	0	0	2	0	0	0	No	Yes	0	Satisfied	0	No	n/a	No	n/a	Yes	No	Yes	No
30		F	Caucasian	67	Yes	Yes	0	0	0	0	More than 5 years	0	0	0	Every 2-3 months	0	0	0		PCP	F/F	NJ	Mixed	Established	0.48	0.0833333	0.916667	1	0.0833333	0.666667	0	0	4	0	0	0	Yes	Yes	0	Satisfied	0	Yes	No	No	n/a	Yes	No	Yes	No
31		F	Caucasian	82	Yes	Yes	0	Less than 1 year	0	0	0	0	0	0	Every 2-3 months	0	0	0		PCP	F/F	NJ	Urge	New	0.642857	0.111111	0.888889	1	0.0588235	0.235294	0	0	2	0	0	0	No	Yes	0	Satisfied	0	No	n/a	No	n/a	Yes	Yes	No	Yes
32		F	African-American	51	Yes	Yes	0	0	0	Between 3 and 5 years	0	0	0	0	0	0	Every 6 months	0		URO	M	MI	Urge	Established	0.821429	0.0869565	0.913043	1	0.0454545	0.0909091	0	0	2	0	0	0	No	Yes	0	Satisfied	0	Yes	No	No	n/a	Yes	No	No	No
33		F	Caucasian	50	Yes	Yes	0	0	0	Between 3 and 5 years	0	0	0	0	Every 2-3 months	0	0	0		URO	M	SC	Urge	Established	0.714286	0.24	0.76	4	0.173913	0.217391	1	1	4	0	1	0	No	Yes	0	Satisfied	0	Yes	Yes	No	n/a	Yes	No	No	No
34		F	Caucasian	50	No	No	0	Less than 1 year	0	0	0	0	0	0	Every 2-3 months	0	0	0		URO/GYN	M	OH	Mixed	New	0.3	0	1	0	0	0.333333	0	0	1	0	0	0	No	No	n/a	n/a	n/a	Yes	No	No	n/a	Yes	No	No	n/a
35		F	Caucasian	28	Yes	Yes	0	0	Between 1 and 3 years	0	0	0	More than once per month	0	0	0	0	0		URO/GYN	M	OH	Mixed	New	0.466667	0.142857	0.857143	1	0.142857	0.142857	0	0	3	0	0	0	Yes	Yes	0	0	Unsatisfied	Yes	Yes	Yes	Physician	Yes	Yes	No	No
36		F	Caucasian	57	Yes	Yes	0	0	Between 1 and 3 years	0	0	0	0	0	0	0	0	last 13 weeks, every week "for stimulator", other		URO/GYN	M	OH	Mixed	Established	0.4	0.75	0.25	2	0.666667	0	1	1	1	0	1	1	No	No	n/a	n/a	n/a	Yes	No	No	n/a	Yes	No	No	n/a
37		F	Caucasian	32	Yes	Yes	0	0	0	0	More than 5 years	0	0	Once per month	0	0	0	0		PCP	M	OH	Mixed	New	0.829268	0.0294118	0.970588	0	0	0.212121	1	1	3	0	0	0	No	Yes	0	Satisfied	0	Yes	Yes	Yes	Physician	Yes	No	Yes	Yes
38		F	Caucasian	23	Yes	Yes	0	0	0	0	More than 5 years	0	0	Once per month	0	0	0	0		PCP	M	OH	Mixed	Established	0.583333	0.0357143	0.964286	1	0.0357143	0.535714	1	1	3	0	0	0	No	Yes	0	Satisfied	0	Yes	No	Yes	Physician	Yes	No	No	Yes
39		F	Caucasian	44	Yes	Yes	0	0	0	0	More than 5 years	0	0	Once per month	0	0	0	0		PCP	M	OH	Mixed	Established	0.8	0	1	0	0	0.45	0	0	3	0	0	0	No	Yes	0	Satisfied	0	Yes	Yes	Yes	Patient	Yes	No	No	Yes
40		F	Caucasian	82	Yes	Yes	0	0	0	0	More than 5 years	0	0	0	Every 2-3 months	0	0	0		PCP	M	FL	Mixed	Established	0.646341	0	1	0	0	0.525	0	0	9	0	0	0	No	No	n/a	n/a	n/a	No	n/a	Yes	Patient	Yes	No	No	n/a
41		F	African-American	30	Yes	Yes	0	Less than 1 year	0	0	0	0	More than once per month	0	0	0	0	0		GYN	M	IL	Mixed	New	0.48	0.166667	0.833333	2	0.166667	0.166667	1	1	3	0	0	0	No	Yes	0	Satisfied	0	Yes	Yes	No	n/a	Yes	No	No	Yes
42		F	Caucasian	67	Yes	Yes	0	Less than 1 year	0	0	0	0	More than once per month	0	0	0	0	0		URO	M	MI	Urge	New	0.0909091	0	1	0	0	1	0	0	1	0	0	0	No	Yes	Extremely satisfied	0	0	Yes	No	Yes	Patient	Yes	No	No	Yes
N/A	N/A	Male	Caucasian	Aver	Yes	Yes	⁭This is my first visit	Less than 1 year	Between 1 and 3 years	Between 3 and 5 years	More than 5 years	This is my first visit	More than once per month	Once per month	Every 2-3 months	Every 4 months	Every 6 months	Other (please specify)	N/A	PCP	Male	FL	Urge	New	Average	Average	Average	Average	Average	Average	Average	Average	Average	Average	Average	Average	Yes	Yes	Extremely Satisfied	Satisfied	Unsatisfied	Yes	Yes	Yes	Patient	Yes	Yes	Yes	Yes
		3	31	58.0952	41	41	1	14	8	3	16	1	7	6	14	2	5	7		14	35	2	21	17	0.50326	0.112793	0.887207	0.880952	0.0857063	0.394816	0.333333	0.428571	2.5	0.047619	0.0714286	0.047619	14	31	6	18	7	28	10	17	9	39	3	7	20
		Female	African-American	Min	No	No														URO	Female	NY	Mixed	Established	Yes	Yes	Yes	Yes	Yes	Yes	No	0	0	0	No	No	No	No				No	No	No	Physician	No	Partially	No	No
		39	7	23	1	1														11	7	3	21	25	42	28	42	22	22	40	28	28	3	40	39	40	28	11				14	19	25	8	3	4	35	18
		Total	Asian	Max	Total	Total														URO/GYN	Total	TX	Total	Total	No	No	No	No	No	No	Yes	1	1	1	Yes	Yes	Total	Total				Total	n/a	Total	n/a	Total	No	Total	n/a
		42	2	85	42	42														7	42	4	42	42	0	14	0	20	20	2	14	11	8	2	3	2	42	42				42	13	42	25	42	33	42	4
			Hispanic																	GYN		IL			Total	Total	Total	Total	Total	Total	Total	2	2	2	Total	Total							Total		Total		n/a		Total
			2																	10		7			42	42	42	42	42	42	42	2	11	0	42	42							42		42		2		42
			Total																	Total		CA			Yes	Yes	Yes	Yes	Yes	Yes	Yes	3	3	3	Yes	Yes											Total
			42																	42		7			1	0.666667	1	0.52381	0.52381	0.952381	0.333333	1	12	0	0.0714286	0.047619											42
																						NJ			No	No	No	No	No	No	No	4	4	4	No	No
																						10			0	0.333333	0	0.47619	0.47619	0.047619	0.666667	0	6	0	0.928571	0.952381
																						MI										5	5	5
																						2										0	0	0
																						SC										6	6	6
																						1										0	1	0
																						OH										7	7	7
																						6										0	0	0
																						Total										8	8	8
																						42										0	0	0
																																9	9	9
																																0	1	0
																																Total	Total	Total
																																42	42	42
																																Yes	Yes	Yes
																																14	39	2
																																0.333333	0.928571	0.047619
																																No	No	No
																																28	3	40
																																0.666667	0.0714286	0.952381
[truncated: 5 more columns]

## Sheet: Data by Physician
	MD #	MD Initials	MD Specialty	MD Gender	City/State	Number of years in practice	Did MD ask any open-ended questions	Did MD use any successful ask sequences	Did MD use any ask-tell-ask sequences	Did MD use any ask-tell sequences	Did MD use any ask-tell-ask sequences with an open-ended question	Did MD use any ask-tell-ask sequences with a successful ask sequence	Did MD make any treatment changes	Did MD allay concerns during any visits	Did MD discuss quality of life during any visits	Did MD bring up QOL in any visits	Did MD bring up adherence in any visits
	1		PCP	Male	CA	23	No	No	yes	Yes	No	No	Yes	No	Yes	No	No
	2		PCP	Male	CA	26	Yes	Yes	No	Yes	No	No	No	No	Yes	No	No
	3		GYN	Male	CA	15	Yes	Yes	yes	Yes	No	No	Yes	No	Yes	No	Yes
	4		GYN	Male	TX	8	No	No	yes	Yes	No	No	Yes	No	Yes	No	No
	5		GYN	Male	IL	22	Yes	Yes	yes	Yes	No	No	No	Yes	No	No	No
	6		URO	Male	IL	20	Yes	Yes	yes	Yes	Yes	Yes	No	No	No	No	No
	7		URO/GYN	Female	NJ	4	Yes	Yes	yes	Yes	No	No	Yes	Yes	Yes	Yes	Yes
	8		URO	Male	NY	25	Yes	Yes	No	Yes	No	No	Yes	Yes	Yes	Yes	Yes
	9		PCP	Male	NJ	26	Yes	Yes	No	Yes	No	No	Yes	Yes	Yes	Yes	Yes
	10		URO	Male	FL	30	Yes	No	yes	Yes	No	No	No	No	Yes	No	No
	11		PCP	Female	NJ	20	Yes	Yes	No	Yes	No	No	Yes	No	No	No	Yes
	12		PCP	Female	NJ	4	Yes	Yes	No	Yes	No	No	No	No	No	No	Yes
	13		URO	Male	MI	30	Yes	Yes	No	Yes	No	No	No	No	Yes	No	No
	14		URO	Male	SC	5	Yes	Yes	yes	Yes	Yes	No	No	Yes	No	No	No
	15		URO/GYN	Male	OH	25	Yes	Yes	yes	Yes	Yes	Yes	Yes	Yes	Yes	Yes	No
	16		PCP	Male	OH	17	Yes	Yes	yes	Yes	No	No	No	Yes	Yes	Yes	Yes
	17		PCP	Male	FL	17	No	No	No	Yes	No	No	No	No	Yes	No	No
	N/A	N/A	PCP	Male	CA	Average	Yes	Yes	Yes	Yes	Yes	Yes	Yes	Yes	Yes	Yes	Yes
			7	14	3	18.6471	14	13	10	17	3	2	8	7	12	5	7
			URO	Female	NY	Min	No	No	No	No	No	No	No	No	No	No	No
			5	3	1	4	3	4	7	0	14	15	9	10	5	12	10
			GYN	Total	IL	Max	Total	Total	Total	Total	Total	Total	Total	Total	Total	Total	Total
			3	17	2	30	17	17	17	17	17	17	17	17	17	17	17
			URO/GYN		TX	Total
			2		1	17
			Total		NJ
			17		4
					MI
					1
					FL
					2
					OH
					2
					SC
					1
					Total
					17
